# Supplementary material
Source: publisher figshare collection journal article supplement (https://gsajournals.figshare.com/ndownloader/files/25392743)
Supplement: Supplementary file 1 [file 25392743]

Table S1: List of lines generated and used in this study.

| Sr. No | Genotype |  |
| --- | --- | --- |
| 1 | *elav-GAL4, ctaRC10/CyOActGFP* |  |
| 2 | *UAS-fog, ctaRC10/CyOActGFP* |  |
| 3 | *htl-GAL4, UAS-CD4td-GFP, ctaRC10/CyOActGFP* |  |
| 4 | *UAS-fog,mistRNAi41930/CyOActGFP* |  |
| 5 | *UAS-fog/CyODYFP;UAS-mistRNAi33135*/TM3SerActGFP |  |
| 6 | *elav-GAL4, ctaRC10/CyOActGFP; htlAB42/TM3SerActGFP* |  |
| 7 | *UAS-fog, ctaRC10/CyOActGFP; htlAB42/TM3SerActGFP* |  |
| 8 | *elav-GAL4, ctaRC10/CyOActGFP; UAS-smogRNAi/TM3SerActGFP* |  |
| 9 | *UAS-fog/CyOActGFP; htlYY262/TM3SerActGFP* |  |
| 10 | *UAS-fog/CyOBetaGal; htlYY262/TM3ftzLacz* |  |
| 11 | *UAS-fog/CyOBetaGal; htlAB42/TM3SerActGFP* |  |
| 12 | *UAS-fog/CyOBetaGal; htlAB42/ TM3ftz-lacZ* |  |
| 13 | *UAS-fog/CyOBetaGal; UAS-htlRNAi/ TM3ftzLacz* |  |
| 14 | *UAS-fog/ CyOActGFP; htlRNAi/ TM3SerActGFP* |  |
| 15 | *UAS-fog/ CyOActGFP; dof111/TM3SerActGFP* |  |
| 16 | *elav-GAL4/CyOBetaGAL; htlYY262/TM3SerActGFP* |  |
| 17 | *elav-GAL4/CyOBetaGAL; htlAB42/TM3SerActGFP* |  |
| 18 | *elav-GAL4/CyOBetaGAL; dof111/TM3SerActGFP* |  |
| 19 | *htl-GAL4-UAS-CD4tdGFP/CyOBetaGal; htlAB42/ TM3ftzLacz* |  |
| 20 | *htl-GAL4-UAS-CD4tdGFP/CyOBetaGal; htlYY262/ TM3ftzLacz* |  |
| 21 | *htl GAL4, UAS-mCD8GFP/CyOActGFP; htlS1-28/ TM3SerActGFP* |  |
| 22 | *C155-GAL4; smogKO/CyOActGFP* |  |
| 23 | *UAS-fog/CyoActGFP; smogRNAi/TM3SerActGFP* |  |
